# Supplementary material
Source: PubMed Central journal article supplement (PMC4767660)
Supplement: NIHMS752910-supplement-1.pdf [file NIHMS752910-supplement-1.pdf]

**A****Aa-prepro-PTTH, pl 5.9, MW 25005**

```

1 ATGAAGTTAGTGTTCATATTAATATGTGCCATCTACTCGCTGACATACCAAGTGCATGGC 60
1 M K L V F I L I C A I Y S L T Y Q V H G 20

61 AAAATAAAATTCGGTTCATCACCTCTGTTCGAGAATGTGTTCATCATCTGATTTTCGAG 120
21 K I K F G S S P L F E N V F L S S D F E 40

121 CAGAAAACTGGCAGGATTAACGGAATCGGAATCTCTCAACTGCTTTCCACCAGCGGAT 180
41 Q K N L A G L T E S E S L N C F P P A D 60

181 CGACACCACAGATATGAATGGGCGGTGGATTCAACCAAAAGCATATTCTGGACGAACTG 240
61 R H H R Y E W A G G F N Q K H I L D E L 80

241 GATAAACTAACGAGGAAACGAACGATGAAAGTGATTGAGAAAGTGAGGGGTTTCGACGAA 300
81 D K T N E E T N D E S D S E S E G F D E 100

301 AATATCTGAAGAAACGGAACGACAAGCATGGCGATCTATCGGCGGATTTATCTCTCAA 360
101 N I L K K R N D K H G D L S A D L F S Q 120

361 TATCCATCGTCTTTGTGTGCTTGCCAAACCAAGTACGAGCTGTGGACTTGGGATATACACAT 420
121 Y P S S C A C Q T K Y E L L D L G Y T H 140

421 TTTCTCGTATATAGTAAACGCCATTTGCCAGAATCGTAACATAAACAGCCGCAATGC 480
141 F P R Y I V N A I C Q N R N I N S R K C 160

481 TGGCGCGGATCAGCTGCAAAGAGATTCCGTACAAAGTACGCGTTCTGACTCAACGTGCA 540
161 W R G S R C K E I P Y K V R V L T Q R A 180

541 GAAGGAGAATCAATTGAGCAGGACCATCTTCTACGCTCCTCCGGAACCGTTGCAGAGAC 600
181 E G E S I E Q D H H S T L L P E P L R D 200

601 ATATGGCGATTCAAACGTGCACCATAGCAGCCGCTTCCCAATGTTTCGATATAG 654
201 I W R F K T V T I A A A C Q C S I * 217

```

**B****Bm-prepro-PTTH, pl 8.6, MW 26,028**

```

1 atgattactcgaccgattatattagtcattttgtgttacgctattccttatgatagtgcag 60
1 M I T R P I I L V I L C Y A I L M I V Q 20

61 tcattctgtgcctaagaagcggtagcgctgaaaagaaaaccagacgtgggtgttttatggta 120
21 S F V P K A V A L K R K P D V G G F M V 40

121 gaagaccaacgcacacataaaagtcaactacatgatgaaaagagcaagaatgacgctt 180
41 E D Q R T H K S H N Y M M K R A R N D V 60

181 ttgggagataaagaaaacgtcaggccgaatccttactacacggagccttttgaccagac 240
61 L G D K E N V R P N P Y Y T E P F D P D 80

241 acgagcccagaagaattgtccgctttaatagttgattacgccaatagattaggaacgat 300
81 T S P E E L S A L I V D Y A N M I R N D 100

301 gttattctgttggataattccggtgaaacgagaactcgaaaaggggaaacattcaagtt 360
101 V I L L D N S V E T R T R K R G N I Q V 120

361 gaaaaccaagctattccggatccaccttgcaactgcaaatacaagaaagaatagaagac 420
121 E N Q A I P D P P C T C K Y K K E I E D 140

421 ttgggcaaaaactctgttccacgcttcattgaaaccagaactgtaataaaacacaacag 480
141 L G E N S V P R F I E T R N C N K T Q Q 160

481 ccgacttgcgacccccctacatttgcaagaaagtttatacagataaactattttaaaa 540
161 P T C R P P Y I C K E S L Y S I T I L K 180

541 agaagggaaactaaatcgaggagtctctcgagataccgaatgaattgaaatatcgatgg 600
181 R R E T K S Q E S L E I P N E L K Y R W 200

601 gtggcggaatctcaccocgctcagcgtggcgtgtttgtgtacaagagactaccaactacga 660
201 V A E S H P V S V A C L C T R D Y Q L R 220

661 tataataataattaa 235
221 Y N N N * 224

```
